# Supplementary material
Source: publisher figshare collection journal article supplement (https://acs.figshare.com/ndownloader/files/3841579)
Supplement: Supplementary file 1 [file 3841579]

## Supporting Information

### A Nonvacuum Approach for Fabrication of $\text{Cu}_2\text{ZnSnSe}_4/\text{In}_2\text{S}_3$ Thin Film Solar Cell and Optoelectronic Characterization

Dhruba B. Khadka, SeongYeon Kim, JunHo Kim\*

Department of Physics, Incheon National University, 12-1 Songdo-dong Yeonsu-gu, 406-772 Incheon, South Korea

**\* Correspondence**

E-mail: [jhk@inu.ac.kr](mailto:jhk@inu.ac.kr)

Phone: +82-32-835-8221

## Supporting data:

Table S1. Device parameters of the corresponding cells of Figure S2.

- S1. Raman spectrum (a) and transmittance (b) of indium sulfide ( $\text{In}_2\text{S}_3$ ) buffer deposited by chemical spray pyrolysis. Inset: (b) Tauc plot for band gap estimation. These results are in good agreement to the earlier reports. [1,2]
- S2. J-V curves of devices fabricated by same conditions as those of best solar cell device.
- S3. J-V-T characteristics of champion device under white light illumination (a) and dark condition (b) in the temperature range 300-90 K with  $\Delta T = 10$  K as indicated by arrow points.
- S4. J-V-T characteristics under different filtered light illuminations: (a) light with wavelengths higher than 665 nm, (b) light with wavelengths higher than 500 nm, and (c) light with wavelengths in between 275-375 nm. Arrow points towards lower temperature ( $T = 300-100$  K;  $\Delta T = 20$  K).
- S5. Charge carrier density profile determined from capacitance voltage (C-V) measurement at 90 K. Inset: Mott-Schottky plot and built-in-potential estimation.

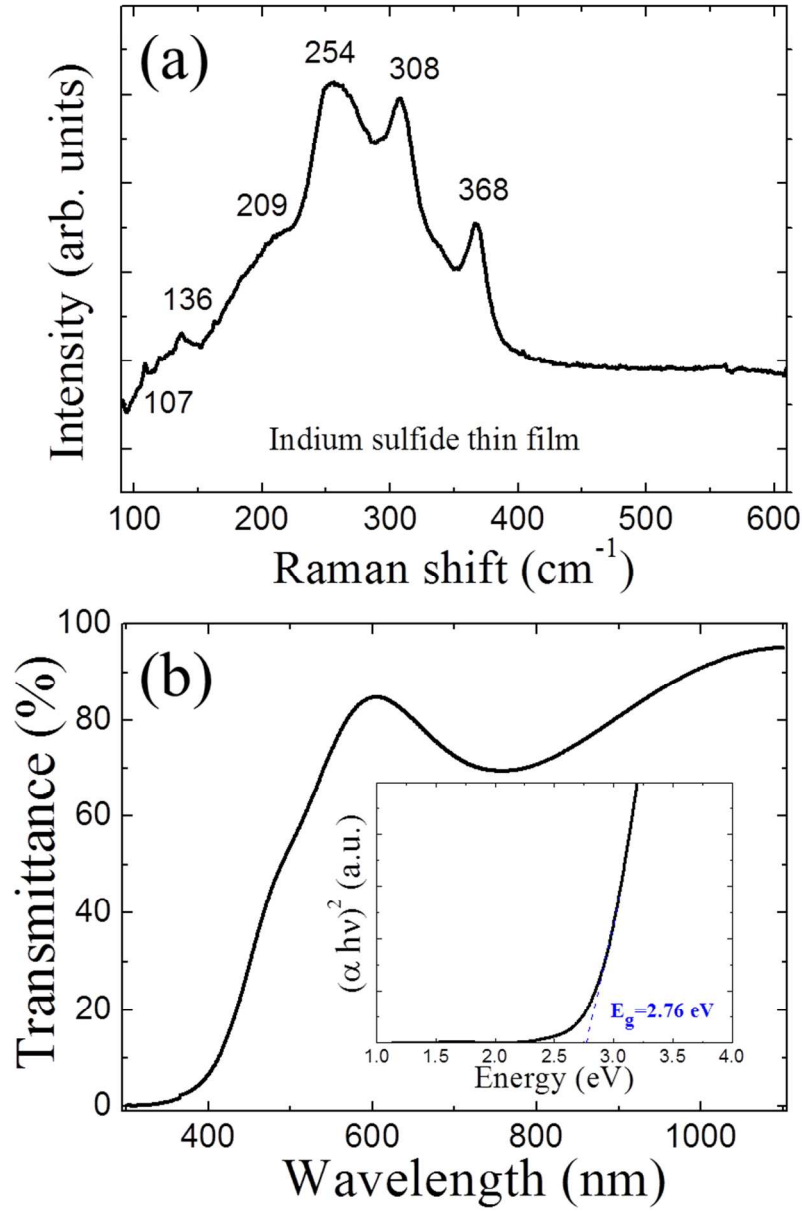

Figure S1. Raman spectrum (a) and transmittance (b) of indium sulfide ( $\text{In}_2\text{S}_3$ ) buffer deposited by chemical spray pyrolysis. Inset: (b) Tauc plot for band gap estimation. These results are in good agreement to the earlier reports.<sup>1,2</sup>

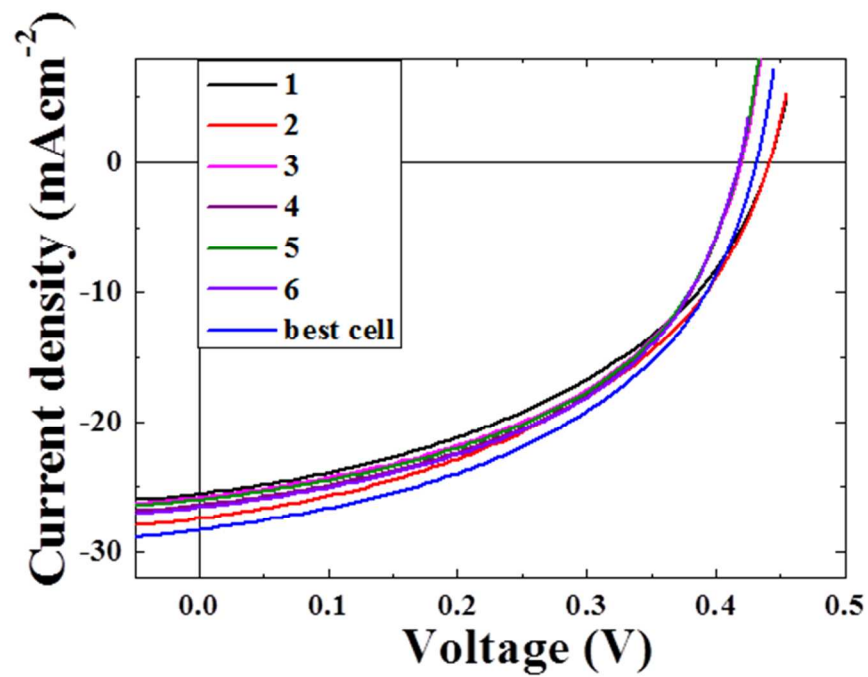

Figure S2. J-V curves of devices fabricated by same conditions as those of best solar cell device. The device parameters are corresponding cells are presented in Table S1.

Table S1. Device parameters of the corresponding cells of Figure S2.

| Device parameters              | 1       | 2       | 3       | 4       | 5       | 6       | Best cell | Average | Standard deviation |
|--------------------------------|---------|---------|---------|---------|---------|---------|-----------|---------|--------------------|
| $V_{oc}$ (V)                   | 0.4411  | 0.4412  | 0.4188  | 0.4179  | 0.4176  | 0.4173  | 0.4313    | 0.4264  | 0.0112             |
| $J_{sc}$ (mAcm <sup>-2</sup> ) | 25.53   | 27.41   | 25.81   | 26.42   | 25.98   | 26.59   | 28.27     | 26.57   | 0.9702             |
| FF (%)                         | 44.34   | 44.81   | 48.46   | 48.85   | 48.86   | 48.73   | 47.07     | 47.30   | 1.968              |
| $\eta$ (%)                     | 4.994   | 5.420   | 5.237   | 5.391   | 5.303   | 5.409   | 5.740     | 5.360   | 0.2249             |
| $R_{sh}$ ( $\Omega$ )          | 640.939 | 641.383 | 736.898 | 747.275 | 778.012 | 762.501 | 632.582   | 705.655 | 64.335             |
| $R_s$ ( $\Omega$ )             | 69.302  | 66.002  | 54.815  | 57.486  | 57.753  | 56.589  | 53.893    | 59.411  | 5.878              |

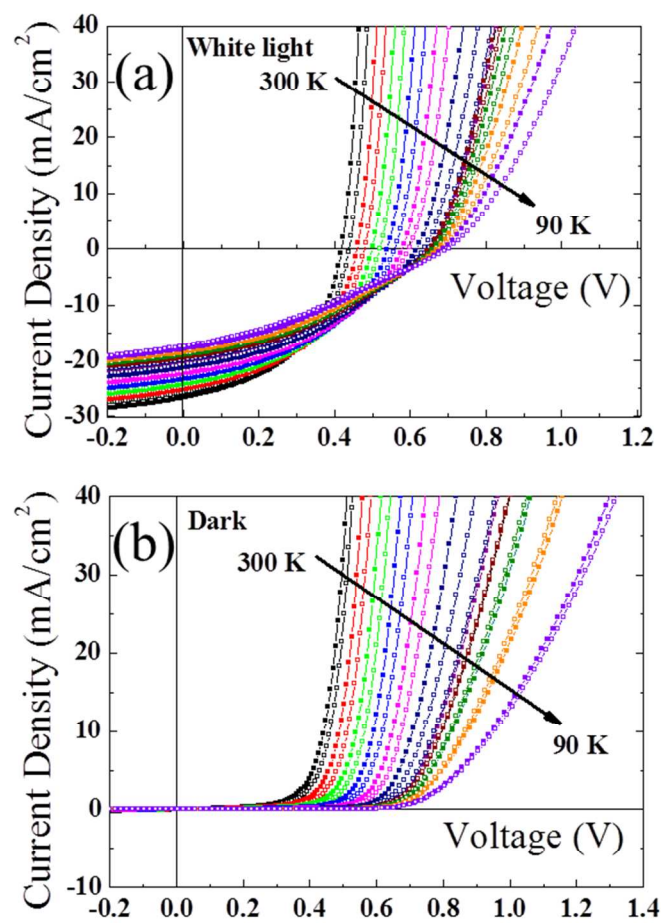

Figure S3. J-V-T characteristics of champion device under white light illumination (a) and dark condition (b) in the temperature range 300 K-90 K with  $\Delta T = 10$  K as indicated by arrow points.

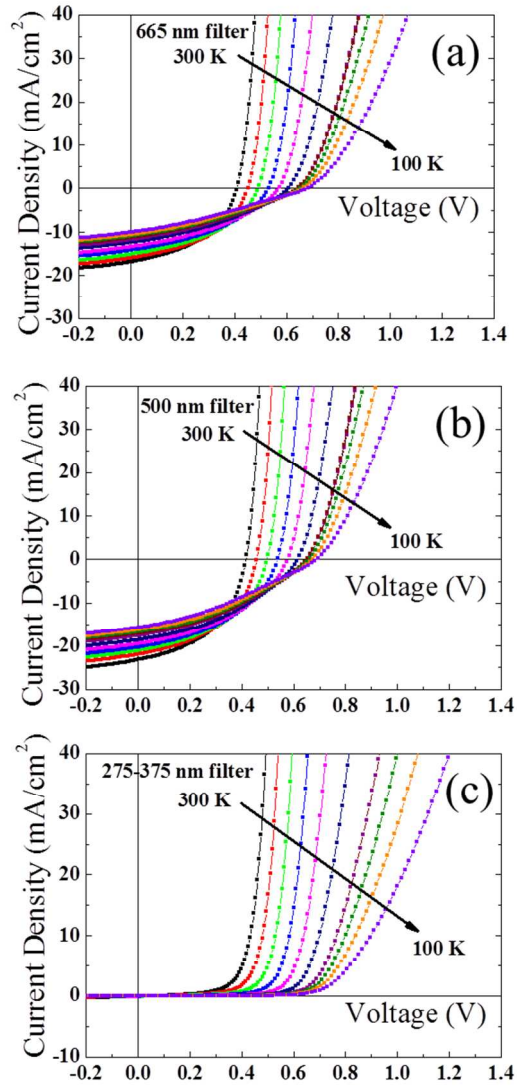

Figure S4. J-V-T characteristics under different filtered light illuminations: (a) light with wavelengths higher than 665 nm, (b) light with wavelengths higher than 500 nm, and (c) light with wavelengths in between 275-375 nm. Arrow points towards lower temperature ( $T = 300\text{ K} - 100\text{ K}$ ;  $\Delta T = 20\text{ K}$ ).

The J-V-T characteristic in the temperature range 300-100 K under filtered light illumination have been studied to get information about blue photon doping or red-kink

effect which usually occurs as consequence of interface conduction band offset. In 665 nm filter case (Fig. S3a), no carriers are generated in the  $\text{In}_2\text{S}_3$  buffer layer ( $E_g = 2.76$  eV, Figure S1) whereas 500 nm filter (Fig. S3b) cuts off around band gap of the buffer layer, therefore the  $J_{sc}$  value is found to be much lower in case of 665 nm filter than that of 500 nm filter compared to the white light illuminated J-V-T results. The slight loss of FF is observed toward low temperatures for J-V-T under 665 nm illuminated filter which indicates weak red-kink effect whereas the filtered light illumination study of CZTSe/CdS solar cell has been reported to have strong red-kink effect.<sup>3</sup> The J-V-T results with 275-375 nm filter illumination (Fig. S3c) is close to dark J-V-T results which indicated no effective contribution from the illuminated light of higher energy range than band gap of buffer layer for photo current generation. In this result, weak red-kink effect is believed to be due to freeze out of shallow acceptor defect at lower temperature.

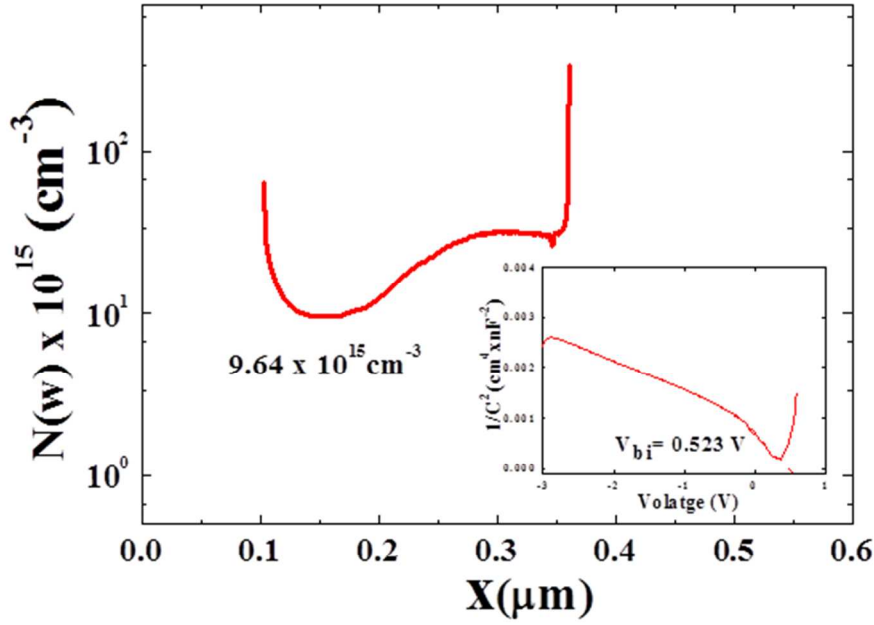

Figure S5. Charge carrier density profile determined from capacitance voltage (C-V) measurement at 90 K. Inset: Mott-Schottky plot and built-in-potential estimation.

C-V measurement was analyzed to estimate the carrier charge density and built in potential at cell junction by Mott-Schottky plot on the basis of following relation.<sup>4,5</sup>

$$\frac{1}{C^2} = \frac{2}{qN_a\epsilon_0\epsilon_sA^2}(V_{bi} - V) \quad (1)$$

$$N_a = -\frac{2}{q\epsilon_0\epsilon_sA^2} \left[ \frac{d}{dV} \left( \frac{1}{C^2} \right) \right]^{-1} \quad (2)$$

where  $N_a$  is free carrier charge density,  $q$  is the fundamental charge,  $\epsilon_0$  is permittivity of free space,  $\epsilon_s$  is dielectric constant, 8.6, for CZTSe<sup>6</sup>, and  $A$  is area of the cell. Figure S5 shows the carrier density profile as function of position in absorber layer calculated using Eq. 2 which is



distributed within a certain range. The built in potential ( $V_{bi}$ ) estimated by evaluating Mott-Schottky plot (Figure S5 Inset) obtained from Eq. 1 is 0.523 V.

## REFERENCES

- (1) Karber, E.; Otto, K.; Katerski, A.; Mere, A.; Krunks, M. Raman Spectroscopic Study of  $\text{In}_2\text{S}_3$  Films Prepared by Spray Pyrolysis, *Mater. Sci. Semicond. Process.* **2014**, *25*, 137–142.
- (2) Otto, K.; Katerski, A.; Mere, A. Volobujeva O, Krunks M, Spray Pyrolysis Deposition of Indium Sulphide Thin Films. *Thin Solid Films* **2011**, *519*, 3055–3060.
- (3) Redinger. A.; Mousel, M.; Djemour, R.; Gutay, L.; Valle, N.; Siebentritt, S.  $\text{Cu}_2\text{ZnSnSe}_4$  Thin Film Solar Cells Produced via Co-evaporation and Annealing Including a  $\text{SnSe}_2$  Capping Layer. *Prog. Photovoltaics: Res. Appl.* **2014**, *22*, 51–57.
- (4) Abou-Ras, D.; Kirchartz, T.; Rau, U. *Advance Characterization Techniques for Thin Film Solar cell*. Wiley-VCH Verlag GmbH & Co. KGaA, Weinheim, Germany **2011**, 81-103.
- (5) Heath, J. T.; Cohen, J. D.; Shafarman, W. N. Bulk and Metastable Defects in  $\text{CuIn}_{1-x}\text{Ga}_x\text{Se}_2$  Thin Films Using Drive-Level Capacitance Profiling. *J. Appl. Phys.* **2004**, *95*, 100-110.
- (6) Persso, C. Electronic and Optical Properties of  $\text{Cu}_2\text{ZnSnS}_4$  and  $\text{Cu}_2\text{ZnSnSe}_4$ . *J. Appl. Phys.* **2010**, *107*, 0537101-0537108.
